# Supplementary material for: Cell‐free DNA as a biomarker of aging
Source: PubMed Central journal article supplement (PMC6351822; doi:10.1111/acel.12890), 2018-12-20

Fig S2

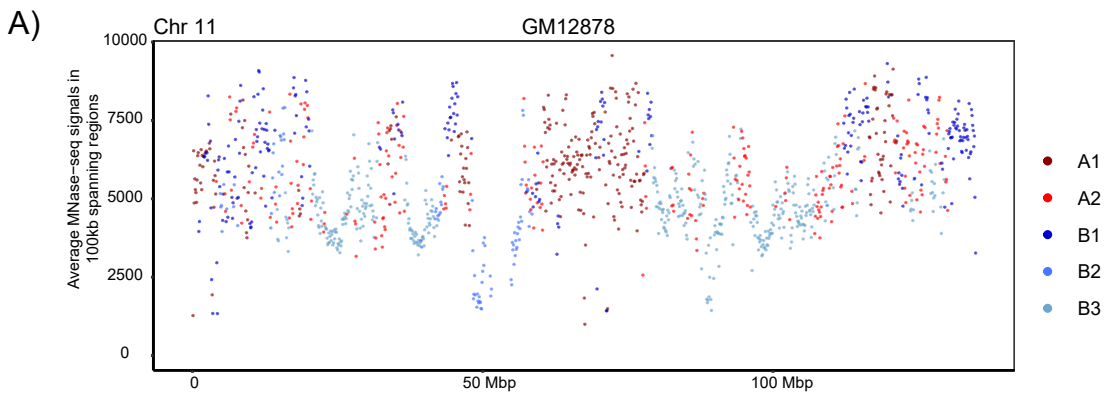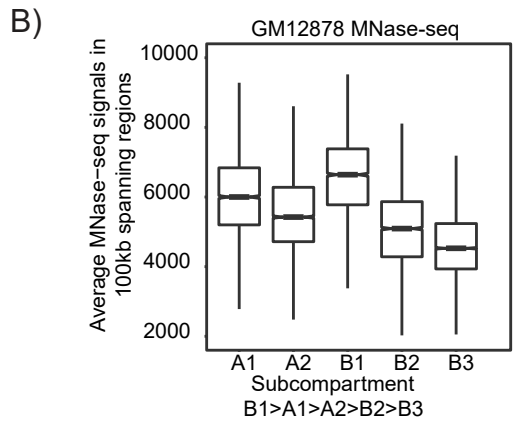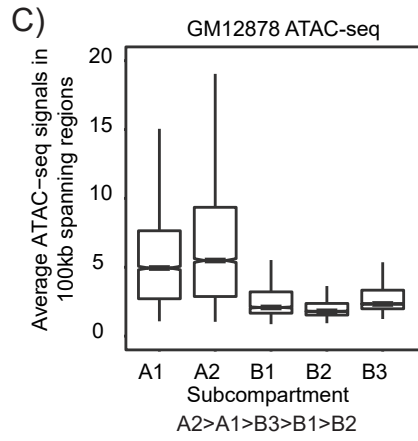

Supplement: ACEL-18-e12890-s002.pdf [file ACEL-18-e12890-s002.pdf]
