# Supplementary material for: Cell‐free DNA as a biomarker of aging
Source: PubMed Central journal article supplement (PMC6351822; doi:10.1111/acel.12890), 2018-12-20
Supplement: ACEL-18-e12890-s003.pdf [file ACEL-18-e12890-s003.pdf]

Fig S3

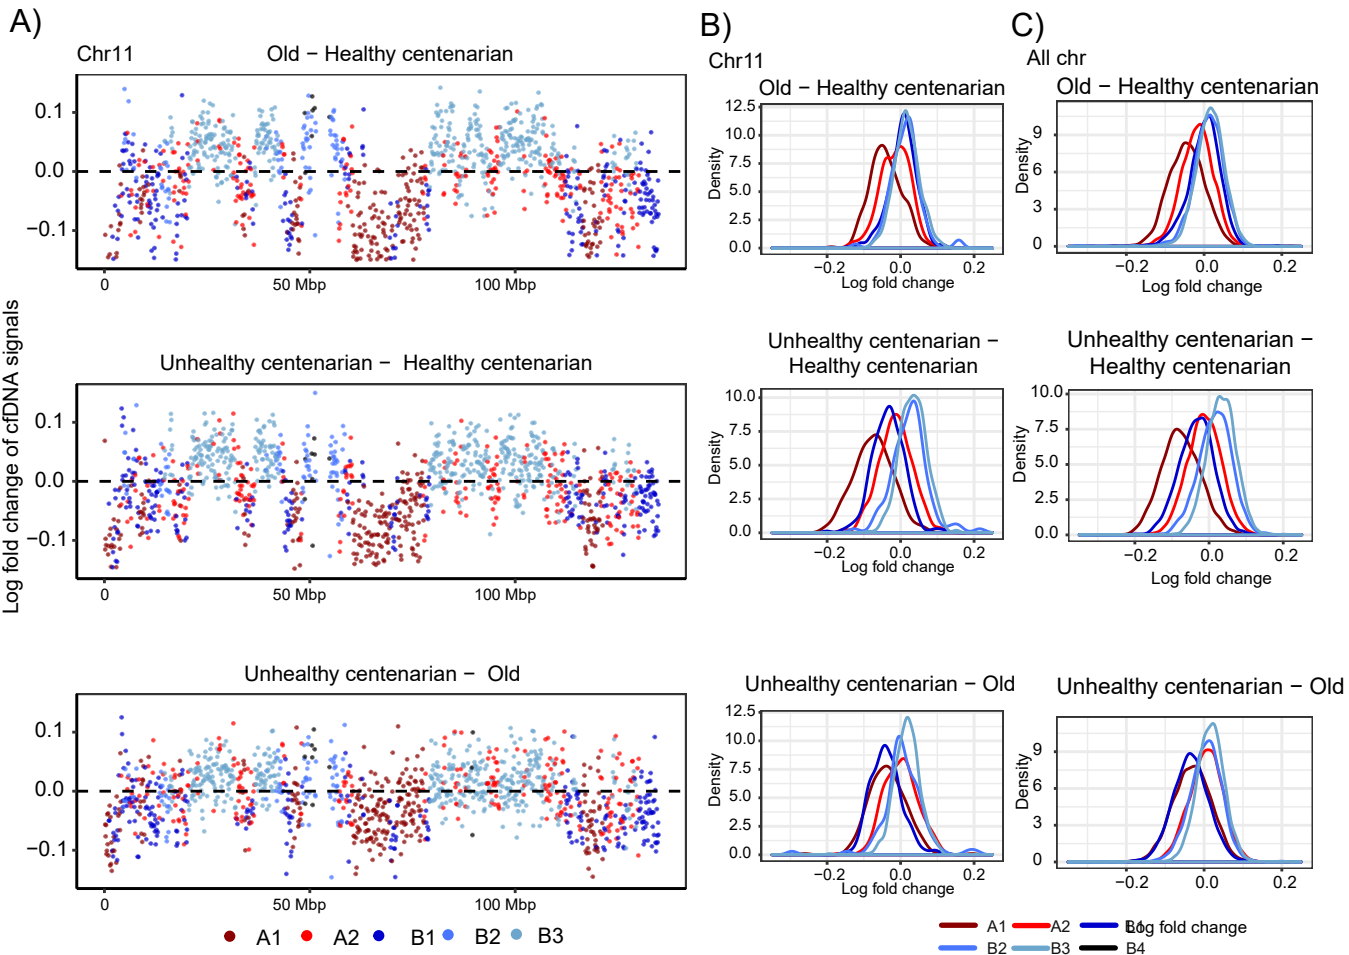

**D) Old - Healthy centenarian**

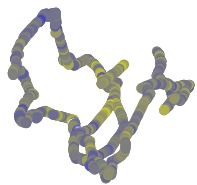

**Unhealthy centenarian - Healthy centenarian**

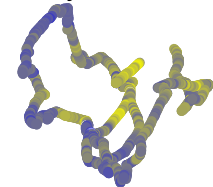

**Unhealthy centenarian - Old**

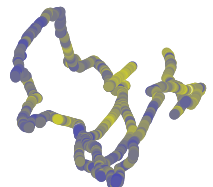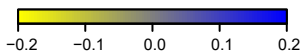

**E)**

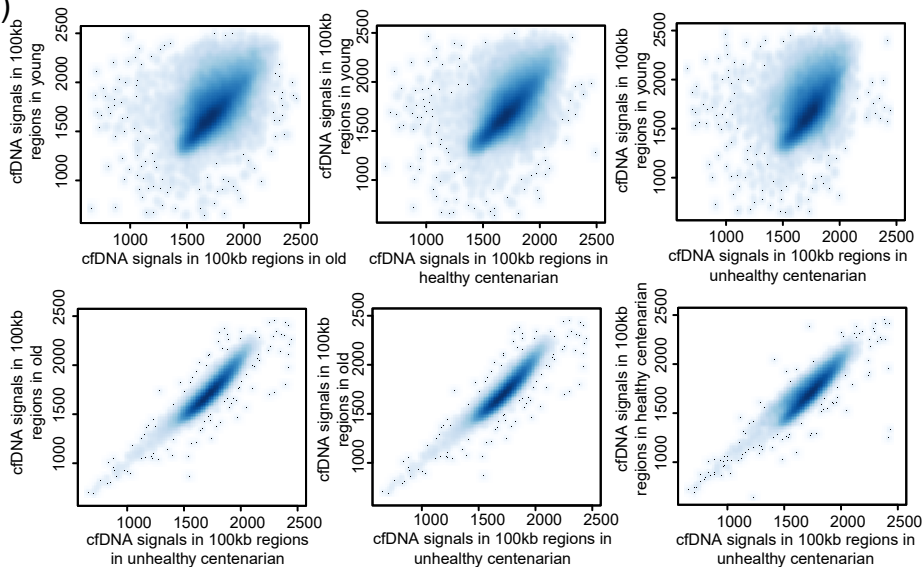

**F)**

Pearson's correlation of 100kb spanning regions

|                       | Young | Old   | Healthy centenarian | Unhealthy centenarian |
|-----------------------|-------|-------|---------------------|-----------------------|
| Young                 |       | 0.553 | 0.603               | 0.494                 |
| Old                   |       |       | 0.939               | 0.944                 |
| Healthy centenarian   |       |       |                     | 0.902                 |
| Unhealthy centenarian |       |       |                     |                       |
