# Supplementary material for: Cell‐free DNA as a biomarker of aging
Source: PubMed Central journal article supplement (PMC6351822; doi:10.1111/acel.12890), 2018-12-20
Supplement: ACEL-18-e12890-s006.pdf [file ACEL-18-e12890-s006.pdf]

Fig S6

A)

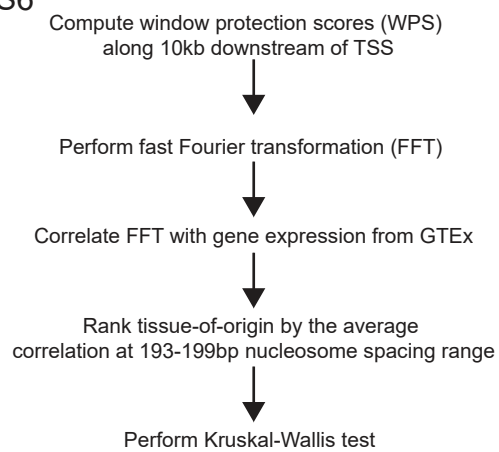

B)

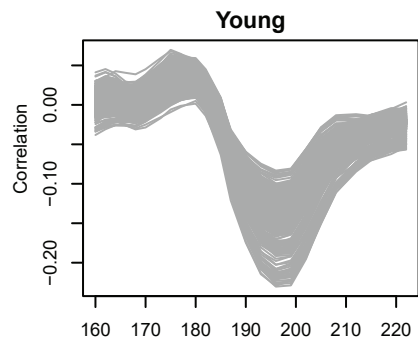

C)

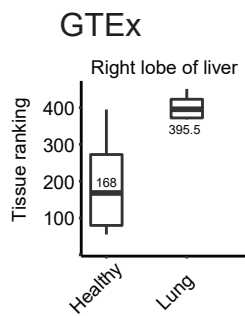

**Liver cancer (HCC) - Healthy (adjusted P<0.05)**

|                     | Increased in median rank by |
|---------------------|-----------------------------|
| Right lobe of liver | <b>133.5</b>                |
| Body of pancreas    | 121                         |
| Lymphoblast         | 32                          |
